# Supplementary material for: Human serum albumin (HSA) coated liposomal indocyanine green for in vivo tumor imaging
Source: Royal Society of Chemistry journal article supplement (doi:10.1039/c5ra25129j), 2016-01-01
Supplement: c5ra25129j1.pdf [file c5ra25129j1.pdf]

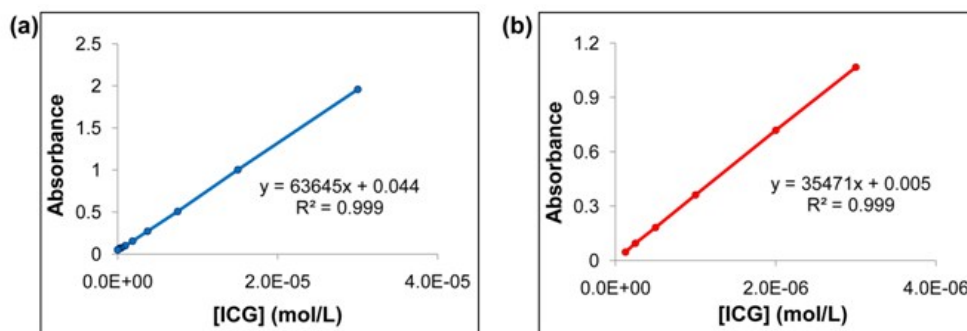

FIG. S1. The standard absorbance curves of (a) ICG solution and (b) ICG in HSA-Lipid-ICG NPs.

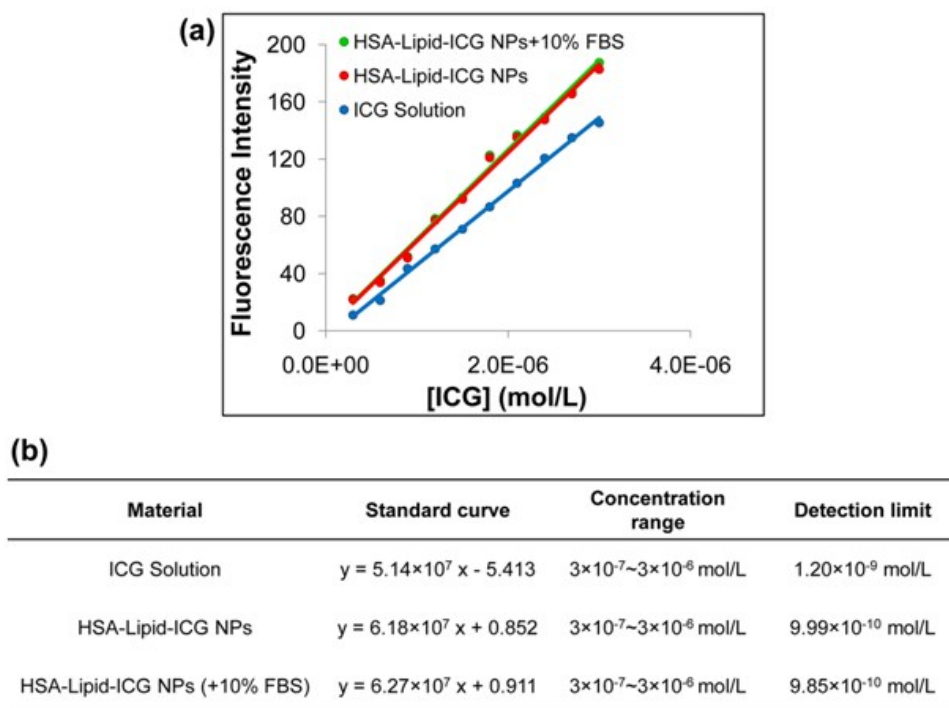

FIG. S2. (a) The standard curves and (b) the details of the calculation of ICG solution, HSA-Lipid-ICG NPs in PBS and HSA-Lipid-ICG NPs in PBS containing 10% FBS..
